# Supplementary material
Source: publisher figshare collection journal article supplement (https://acs.figshare.com/ndownloader/files/4712638)
Supplement: Supplementary file 1 [file 4712638]

# Large Grounds-State Entropy Changes for Hydrogen Atom Transfer Reactions of Iron Complexes

*Elizabeth A. Mader, Ernest R. Davidson, and James M. Mayer\**

University of Washington, Department of Chemistry,  
Box 351700, Seattle, WA, 98195-1700.

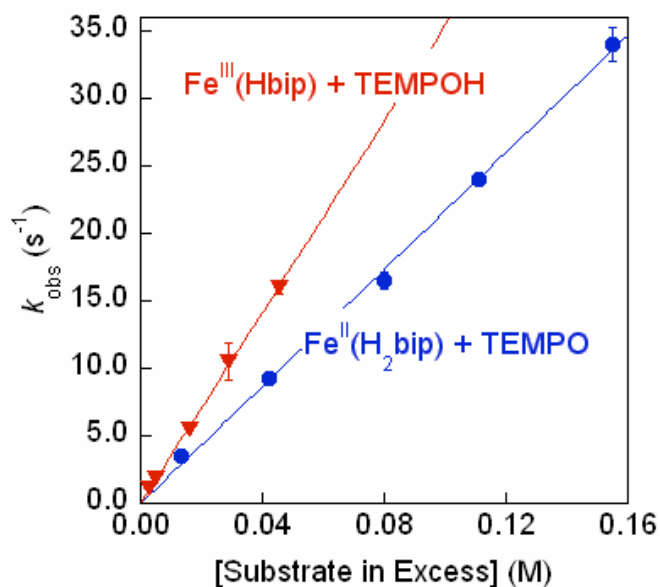

**Figure S1.** Plot of the observed pseudo-first order rate constants for 0.1 mM  $\text{Fe}^{\text{II}}(\text{H}_2\text{bip})$  + excess TEMPO (blue ●) and 0.1 mM  $\text{Fe}^{\text{III}}(\text{Hbip})$  + excess TEMPOH (red ▼) in MeCN at  $T = 46^\circ\text{C}$ .

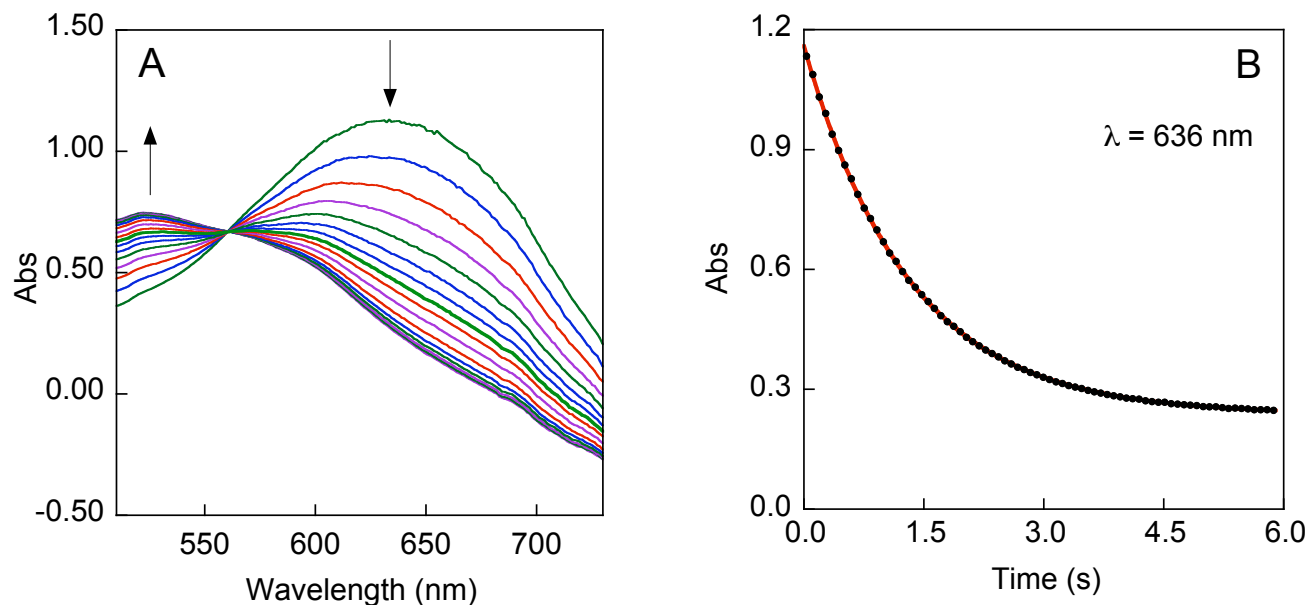

**Figure S2.** A) Evolution of the of the UV-Visible spectrum of 0.4 mM Fe<sup>III</sup>(Hbip) in the presence of 3.9mM TEMPOH (eq 5) over the course of 6 s at T = 25 °C in MeCN. B) Match between the original data (•) and the pseudo first order fit (–) resulting from Olis SVD Global Analysis<sup>1</sup> with over the whole wavelength region in A. Shown only for a single wavelength, 636 nm.

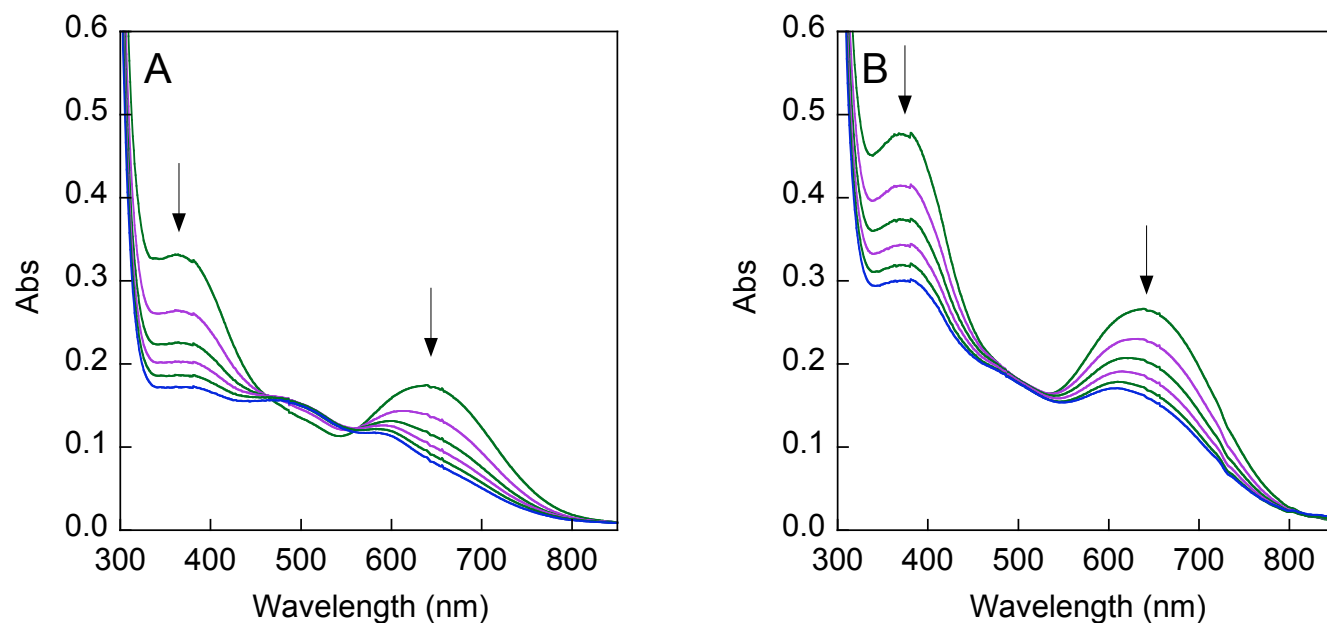

**Figure S3.** Measurement of  $K_5$  by static UV-visible spectrophotometry at 298 K. (A) Addition of  $5 \times 100$   $\mu\text{L}$  increments of 0.13 M TEMPO-H (65  $\mu\text{mol}$  total) to a mixture of 0.154  $\mu\text{mol}$   $\text{Fe}^{\text{III}}(\text{H}_2\text{bip})$  and 19.4  $\mu\text{mol}$  TEMPO in 2.350 mL MeCN. (B) Addition of  $5 \times 100$   $\mu\text{L}$  increments of 0.15 M TEMPO-H (73  $\mu\text{M}$  total) to a mixture of 0.127  $\mu\text{mol}$   $\text{Fe}^{\text{III}}(\text{H}_2\text{bip})$  and 17.3  $\mu\text{mol}$  TEMPO in 2.100 mL  $\text{CH}_2\text{Cl}_2$ .

**Table S1:** Equilibrium constants as independently determined from each spectrum in Figure S3.

| Spectrum                   | $K_5$ MeCN      | $K_5$ $\text{CH}_2\text{Cl}_2$ |
|----------------------------|-----------------|--------------------------------|
| 1                          | 1.85            | 3.70                           |
| 2                          | 1.85            | 3.84                           |
| 3                          | 1.82            | 4.00                           |
| 4                          | 1.82            | 4.17                           |
| 5                          | 1.82            | 4.35                           |
| Average $\pm$<br>Std. Dev. | $1.82 \pm 0.03$ | $4.0 \pm 0.3$                  |

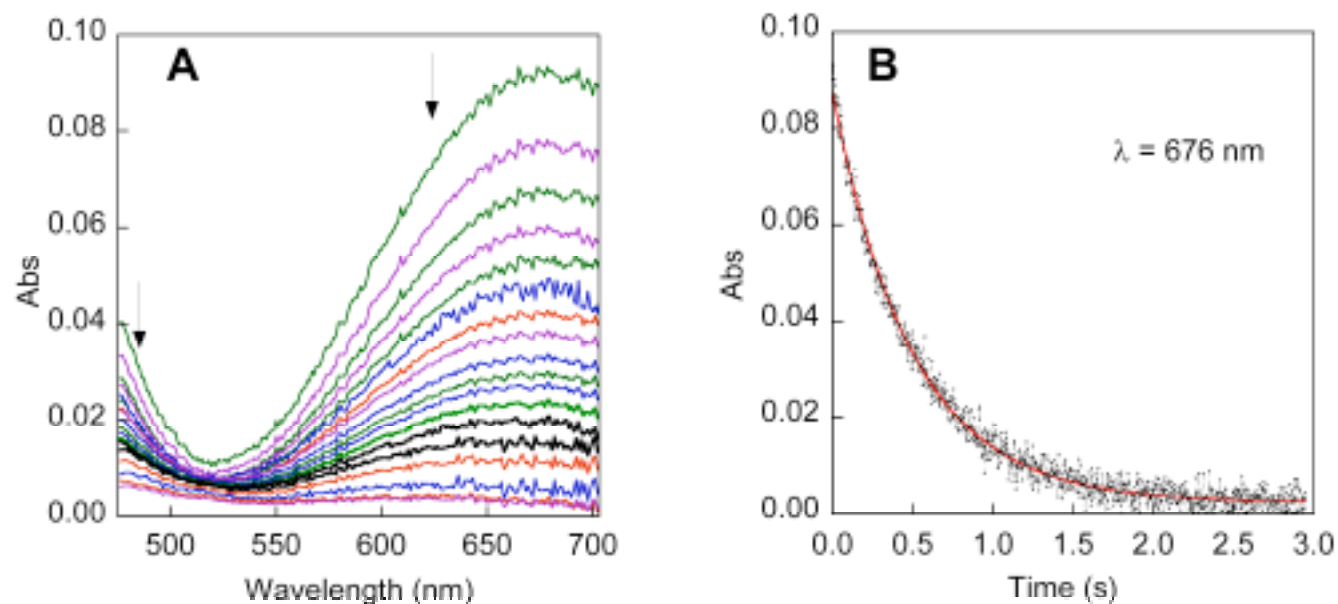

**Figure S4.** A) Evolution of the of the UV-Visible spectrum of  $2.1 \times 10^{-5}$  M  $\text{Fe}^{\text{III}}(\text{Hbim})$  in the presence of 0.65 mM TEMPOH (eq 6) over the course of 3 s at  $T = 25$  °C in MeCN. B) Match between the original data (•) and the pseudo first order fit (—) resulting from Olis SVD Global Analysis<sup>1</sup> with over the whole wavelength region in A. Shown only for a single wavelength, 676 nm.

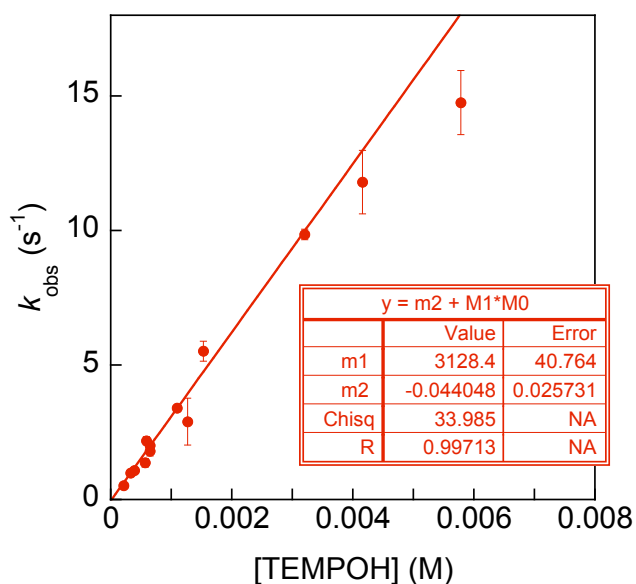

**Figure S5.** Plot of the observed pseudo-first order rate constants for  $2.1 \times 10^{-5}$  M  $\text{Fe}^{\text{III}}(\text{Hbim})$  + excess TEMPO-H in MeCN at  $T = 25$  °C.

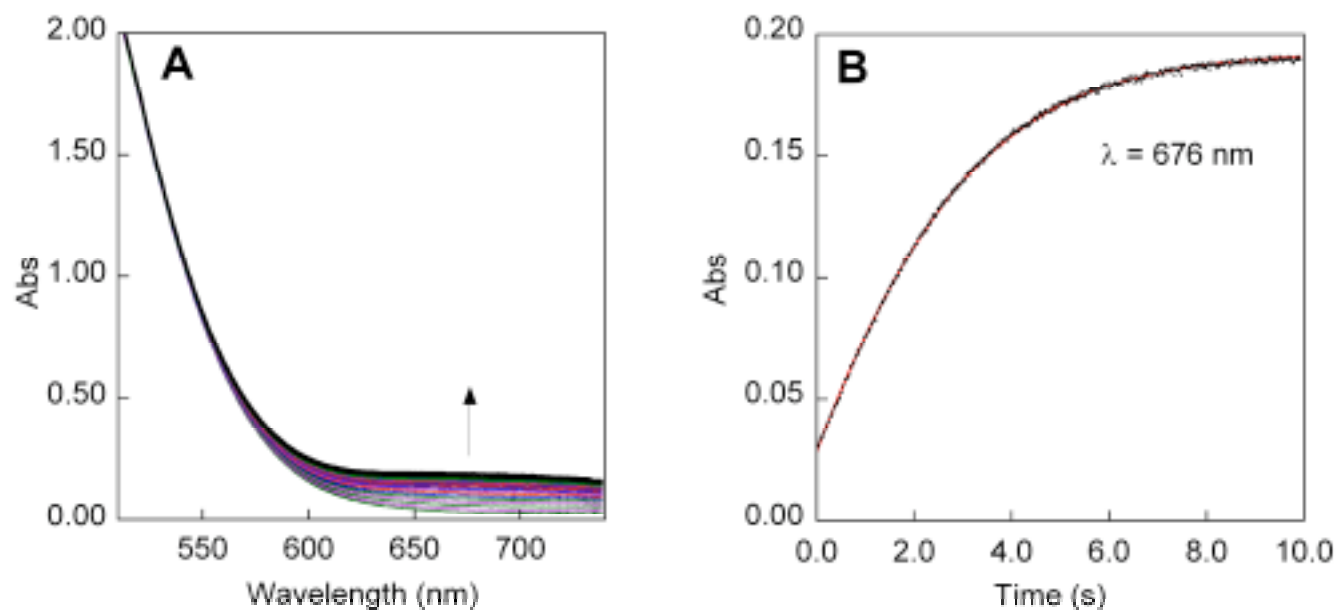

**Figure S6.** A) Evolution of the of the UV-Visible spectrum of 0.09 mM  $\text{Fe}^{\text{II}}(\text{H}_2\text{bim})$  in the presence of 0.28 M TEMPO (eq 6) over the course of 10 s at  $T = 25\text{ }^{\circ}\text{C}$  in MeCN. B) Match between the original data (•) and the approach to equilibrium second order fit (–) resulting from SVD global analysis with Specfit<sup>2</sup> over the whole wavelength region in A. Shown only for a single wavelength, 676 nm.

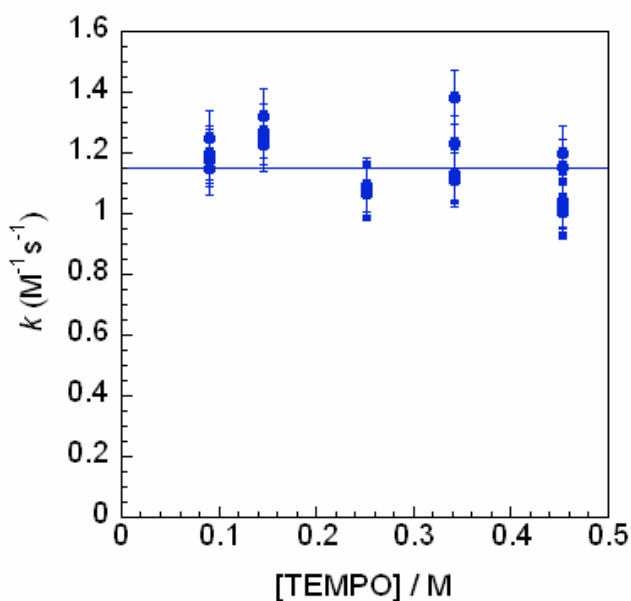

**Figure S7.** Plot of the second-order rate constants ( $k_6$ ) for 0.07 mM  $\text{Fe}^{\text{II}}(\text{H}_2\text{bim})$  with varying TEMPO concentrations directly obtained from Specfit.<sup>2</sup>  $T = 44\text{ }^{\circ}\text{C}$  in MeCN.

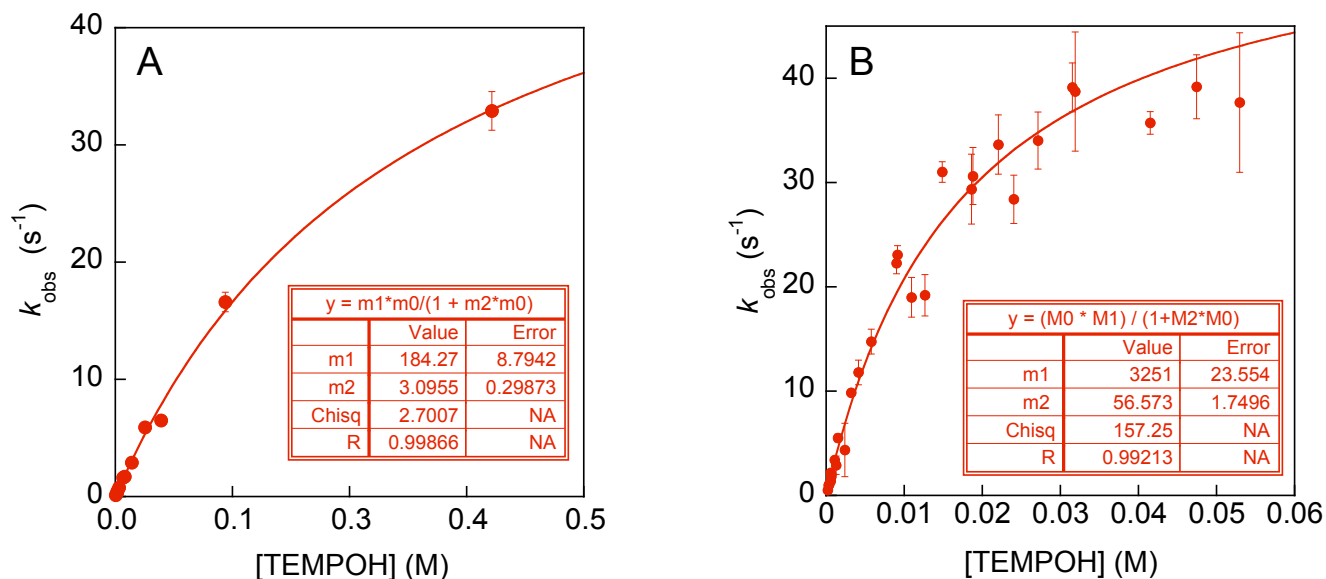

**Figure S8.** Saturation kinetics plot for (A)  $\text{Fe}^{\text{III}}(\text{Hbip}) + \text{TEMPO-H}$  and (B)  $\text{Fe}^{\text{III}}(\text{Hbim}) + \text{TEMPOH}$  fit to eq 9 in MeCN at 298 K. For  $\text{Fe}^{\text{III}}(\text{Hbip}) + \text{TEMPO-H}$ :  $K_{8A} = m2 = 3.1 \pm 0.3 \text{ M}^{-1}$ ,  $k_{8B} = m1/m2 = 59 \pm 6 \text{ M}^{-1}\text{s}^{-1}$ . For  $\text{Fe}^{\text{III}}(\text{Hbim}) + \text{TEMPO-H}$ :  $K_{8A} = m2 = 56.6 \pm 1.7 \text{ M}^{-1}$ ,  $k_{8B} = m1/m2 = 57.4 \pm 1.8 \text{ M}^{-1}\text{s}^{-1}$ .

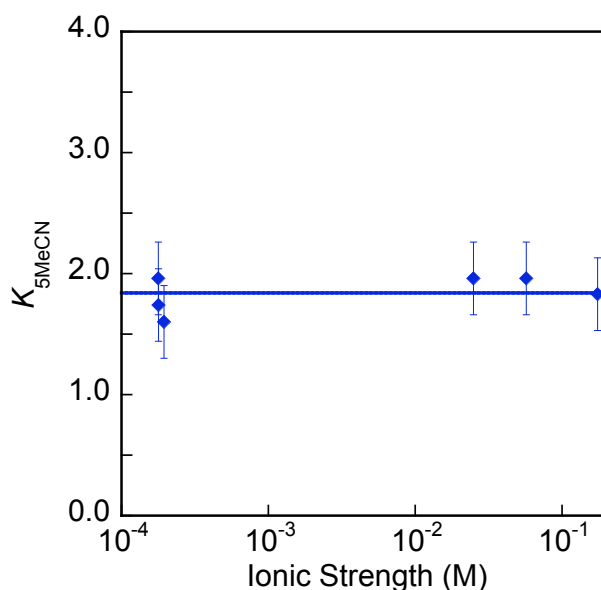

**Figure S9:** Dependence of  $K_5$  on added  $(\text{Bu})_4\text{NClO}_4$  in MeCN at 298 K.

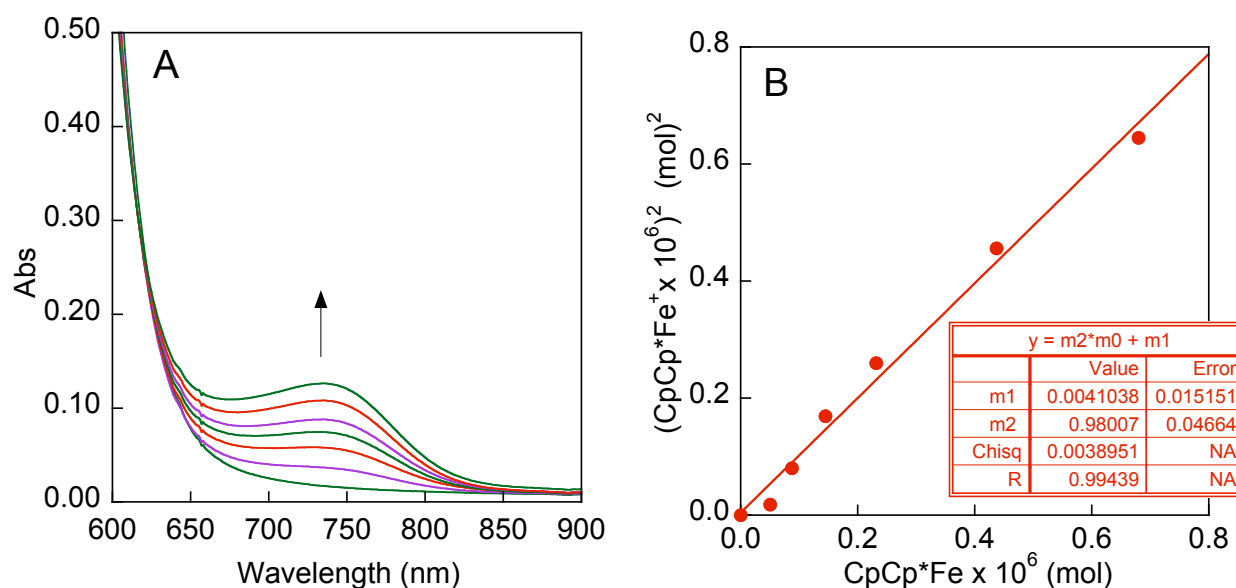

**Figure S10.** Measurement of  $\text{Fe}^{\text{II}}(\text{H}_2\text{bim}) + [\text{CpCp}^*\text{Fe}]^+ \rightleftharpoons \text{Fe}^{\text{III}}(\text{H}_2\text{bim}) + \text{CpCp}^*\text{Fe}$ ;  $K_{10}$  - in MeCN at 298 K. (A) UV-visible spectra of 4.7  $\mu\text{mol}$   $\text{Fe}^{\text{III}}(\text{H}_2\text{bim})$  upon the addition of  $6 \times 0.18 \mu\text{mol}$  increments of  $\text{CpCp}^*\text{Fe}$  (0-1.5  $\mu\text{mol}$  total) in 0.09M  $n\text{Bu}_4\text{NClO}_4$ . (B) Determination of  $K_{10}$ . Plot of  $(\text{mol CpCp}^*\text{Fe})^2$  vs mol  $\text{CpCp}^*\text{Fe}$  should be linear with slope =  $m2 = \text{Fe}^{\text{III}}(\text{H}_2\text{bim}) / K_{10}$ . For this sample  $K_{10} = 4.8 \pm 0.1$  using absorbance data at 740 nm.

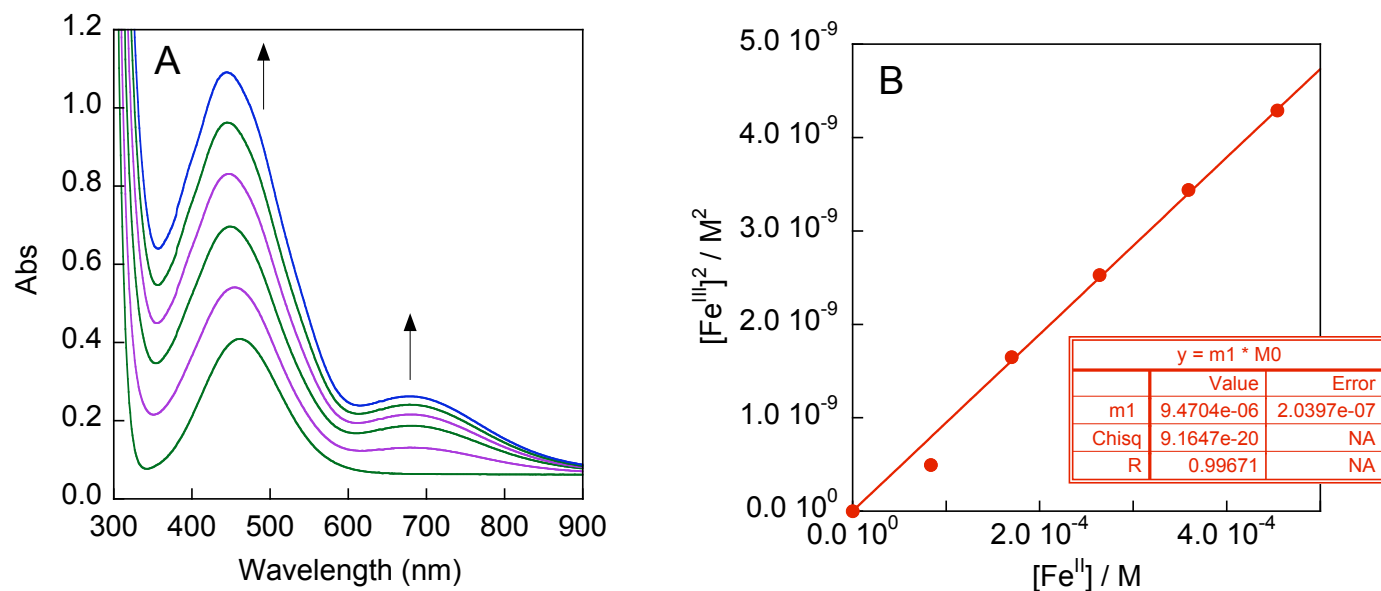

**Figure S11.** Measurement of  $K_6$  by static UV-visible spectrophotometry at 298 K in MeCN. (A) Addition of  $5 \times 10 \mu\text{L}$  increments of 21.3 mM  $\text{Fe}^{\text{II}}(\text{H}_2\text{bim})$  (52  $\mu\text{M}$  total) to 64.6  $\mu\text{mol}$  TEMPO in 2.00 mL MeCN. (B) Plot of  $[\text{Fe}^{\text{III}}]^2$  vs  $[\text{Fe}^{\text{II}}]$  using absorbance data at 676 nm. Plot should be linear with slope =  $m1 = K_6 \times [\text{TEMPO}]$ . For this sample  $K_6 = 3300 \pm 100$ .



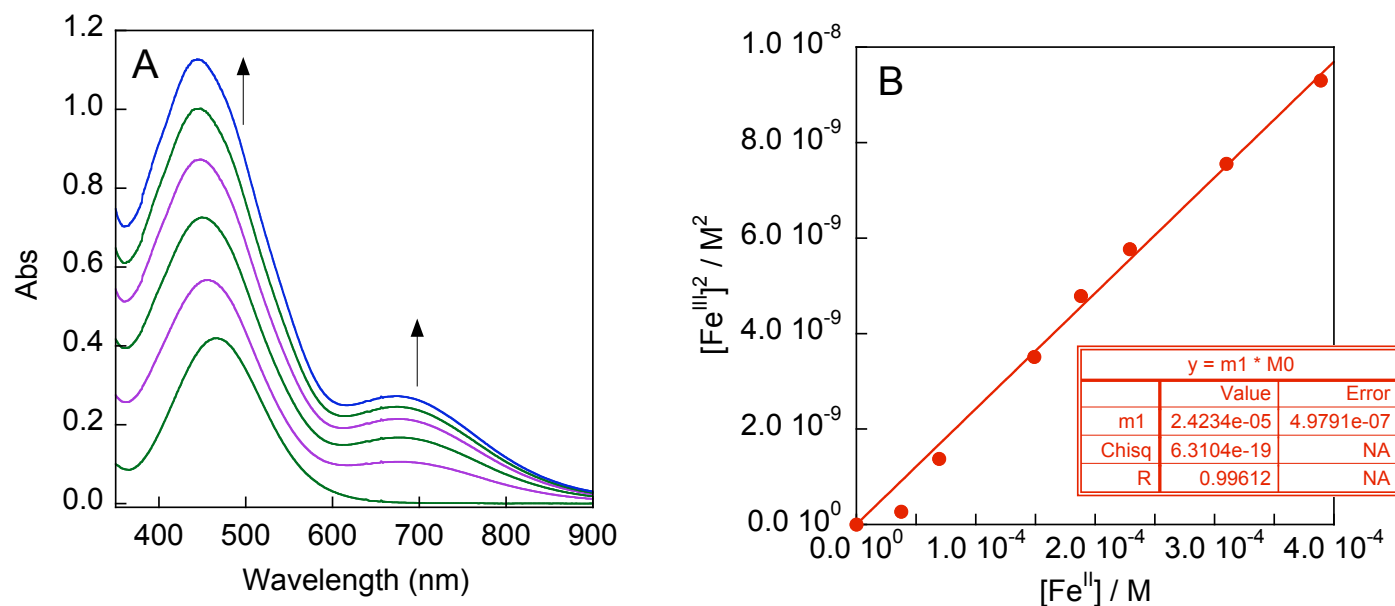

**Figure S12.** Measurement of  $K_6$  by static UV-visible spectrophotometry at 298 K in acetone. (A) Addition of  $5 \times 50 \mu\text{L}$  increments of 19.4 mM  $\text{Fe}^{\text{II}}(\text{H}_2\text{bim})$  (48.5  $\mu\text{M}$  total) to 77.1  $\mu\text{mol}$  TEMPO in 2.00 mL acetone. (B) Plot of  $[\text{Fe}^{\text{III}}]^2$  vs  $[\text{Fe}^{\text{II}}]$  using absorbance data at 676 nm. Plot should be linear with slope =  $m1 = K_6 * [\text{TEMPO}]$ . For this sample  $K_6 = 1540 \pm 50$ .

**Table S2.** Energies, molar heat capacities, and entropies for vibrational modes in the product of Eq 12.

|                      | $E$<br>(kcal mol <sup>-1</sup> ) | $C_v$<br>(cal mol <sup>-1</sup> K <sup>-1</sup> ) | $S$<br>(cal mol <sup>-1</sup> K <sup>-1</sup> ). |
|----------------------|----------------------------------|---------------------------------------------------|--------------------------------------------------|
| <b>TOTAL</b>         | 243.209                          | 78.797                                            | 166.131                                          |
| <b>ELECTRONIC</b>    | 0                                | 0                                                 | 3.561                                            |
| <b>TRANSLATIONAL</b> | 0.889                            | 2.981                                             | 43.350                                           |
| <b>ROTATIONAL</b>    | 0.889                            | 2.981                                             | 34.420                                           |
| <b>VIBRATIONAL</b>   | 241.432                          | 72.836                                            | 84.801                                           |
| VIBRATION 1          | 0.593                            | 1.985                                             | 6.284                                            |
| VIBRATION 2          | 0.594                            | 1.982                                             | 5.341                                            |
| VIBRATION 3          | 0.596                            | 1.977                                             | 4.736                                            |
| VIBRATION 4          | 0.597                            | 1.972                                             | 4.380                                            |
| VIBRATION 5          | 0.598                            | 1.969                                             | 4.169                                            |
| VIBRATION 6          | 0.599                            | 1.965                                             | 3.978                                            |
| VIBRATION 7          | 0.599                            | 1.964                                             | 3.944                                            |
| VIBRATION 8          | 0.601                            | 1.958                                             | 3.720                                            |
| VIBRATION 9          | 0.603                            | 1.952                                             | 3.519                                            |
| VIBRATION 10         | 0.604                            | 1.948                                             | 3.418                                            |
| VIBRATION 11         | 0.606                            | 1.942                                             | 3.289                                            |
| VIBRATION 12         | 0.611                            | 1.926                                             | 2.994                                            |
| VIBRATION 13         | 0.615                            | 1.912                                             | 2.787                                            |
| VIBRATION 14         | 0.630                            | 1.866                                             | 2.320                                            |
| VIBRATION 15         | 0.638                            | 1.838                                             | 2.121                                            |
| VIBRATION 16         | 0.647                            | 1.813                                             | 1.969                                            |
| VIBRATION 17         | 0.647                            | 1.812                                             | 1.964                                            |
| VIBRATION 18         | 0.653                            | 1.793                                             | 1.868                                            |
| VIBRATION 19         | 0.657                            | 1.780                                             | 1.809                                            |
| VIBRATION 20         | 0.662                            | 1.766                                             | 1.743                                            |
| VIBRATION 21         | 0.664                            | 1.760                                             | 1.717                                            |
| VIBRATION 22         | 0.679                            | 1.712                                             | 1.540                                            |
| VIBRATION 23         | 0.701                            | 1.650                                             | 1.351                                            |
| VIBRATION 24         | 0.703                            | 1.644                                             | 1.334                                            |
| VIBRATION 25         | 0.711                            | 1.620                                             | 1.270                                            |
| VIBRATION 26         | 0.720                            | 1.596                                             | 1.214                                            |
| VIBRATION 27         | 0.721                            | 1.593                                             | 1.206                                            |
| VIBRATION 28         | 0.734                            | 1.556                                             | 1.125                                            |
| VIBRATION 29         | 0.749                            | 1.514                                             | 1.041                                            |
| VIBRATION 30         | 0.824                            | 1.325                                             | 0.748                                            |
| VIBRATION 31         | 0.871                            | 1.215                                             | 0.619                                            |
| VIBRATION 32         | 0.882                            | 1.191                                             | 0.594                                            |
| VIBRATION 33         | 0.891                            | 1.170                                             | 0.574                                            |
| VIBRATION 34         | 0.931                            | 1.086                                             | 0.496                                            |

**Table S3.** Energies, molar heat capacities, and entropies for vibrational modes in the reactant of Eq 12.

|                      | $E$<br>(kcal mol <sup>-1</sup> ) | $C_v$<br>(cal mol <sup>-1</sup> K <sup>-1</sup> ) | $S$<br>(cal mol <sup>-1</sup> K <sup>-1</sup> ). |
|----------------------|----------------------------------|---------------------------------------------------|--------------------------------------------------|
| <b>TOTAL</b>         | 241.633                          | 83.231                                            | 184.814                                          |
| <b>ELECTRONIC</b>    | 0                                | 0                                                 | 3.561                                            |
| <b>TRANSLATIONAL</b> | 0.889                            | 2.981                                             | 43.350                                           |
| <b>ROTATIONAL</b>    | 0.889                            | 2.981                                             | 34.676                                           |
| <b>VIBRATIONAL</b>   | 239.856                          | 77.269                                            | 103.229                                          |
| VIBRATION 1          | 0.593                            | 1.986                                             | 6.898                                            |
| VIBRATION 2          | 0.594                            | 1.984                                             | 5.843                                            |
| VIBRATION 3          | 0.594                            | 1.981                                             | 5.258                                            |
| VIBRATION 4          | 0.595                            | 1.980                                             | 5.051                                            |
| VIBRATION 5          | 0.595                            | 1.978                                             | 4.828                                            |
| VIBRATION 6          | 0.596                            | 1.976                                             | 4.688                                            |
| VIBRATION 7          | 0.596                            | 1.974                                             | 4.519                                            |
| VIBRATION 8          | 0.597                            | 1.972                                             | 4.336                                            |
| VIBRATION 9          | 0.597                            | 1.971                                             | 4.269                                            |
| VIBRATION 10         | 0.599                            | 1.967                                             | 4.063                                            |
| VIBRATION 11         | 0.601                            | 1.958                                             | 3.726                                            |
| VIBRATION 12         | 0.602                            | 1.957                                             | 3.680                                            |
| VIBRATION 13         | 0.608                            | 1.937                                             | 3.188                                            |
| VIBRATION 14         | 0.608                            | 1.935                                             | 3.153                                            |
| VIBRATION 15         | 0.612                            | 1.921                                             | 2.918                                            |
| VIBRATION 16         | 0.616                            | 1.909                                             | 2.744                                            |
| VIBRATION 17         | 0.621                            | 1.893                                             | 2.566                                            |
| VIBRATION 18         | 0.624                            | 1.883                                             | 2.467                                            |
| VIBRATION 19         | 0.626                            | 1.878                                             | 2.420                                            |
| VIBRATION 20         | 0.627                            | 1.874                                             | 2.390                                            |
| VIBRATION 21         | 0.636                            | 1.844                                             | 2.162                                            |
| VIBRATION 22         | 0.643                            | 1.824                                             | 2.035                                            |
| VIBRATION 23         | 0.652                            | 1.794                                             | 1.874                                            |
| VIBRATION 24         | 0.656                            | 1.782                                             | 1.816                                            |
| VIBRATION 25         | 0.665                            | 1.756                                             | 1.701                                            |
| VIBRATION 26         | 0.668                            | 1.747                                             | 1.666                                            |
| VIBRATION 27         | 0.676                            | 1.724                                             | 1.579                                            |
| VIBRATION 28         | 0.676                            | 1.721                                             | 1.571                                            |
| VIBRATION 29         | 0.690                            | 1.682                                             | 1.443                                            |
| VIBRATION 30         | 0.789                            | 1.410                                             | 0.867                                            |
| VIBRATION 31         | 0.815                            | 1.345                                             | 0.775                                            |
| VIBRATION 32         | 0.828                            | 1.314                                             | 0.735                                            |
| VIBRATION 33         | 0.839                            | 1.289                                             | 0.704                                            |
| VIBRATION 34         | 0.851                            | 1.261                                             | 0.670                                            |
| VIBRATION 35         | 0.868                            | 1.221                                             | 0.626                                            |
| VIBRATION 36         | 0.940                            | 1.068                                             | 0.480                                            |

**Table S4:** Temperature dependence of relevant extinction coefficients over 270-330 K.<sup>a</sup>

| Species                                  | $\lambda$<br>(nm) | Solvent                                                        |                                                  |                                                     |
|------------------------------------------|-------------------|----------------------------------------------------------------|--------------------------------------------------|-----------------------------------------------------|
|                                          |                   | MeCN                                                           | CH <sub>2</sub> Cl <sub>2</sub>                  | Acetone                                             |
| <b>Fe<sup>II</sup>(H<sub>2</sub>bip)</b> | 460               | $\epsilon = (-5.4 \pm 1.0)T + (3395 \pm 303)$                  | $\epsilon = 1440 \pm 80$                         | --                                                  |
|                                          | 510               | $\epsilon = (-16.7 \pm 1.9)T + (7201 \pm 580)$                 | $\epsilon = (14 \pm 8)T + (6284 \pm 2567)$       | --                                                  |
|                                          | 645               | $\epsilon = (-4.25 \pm 0.55)T + (2161 \pm 168)$                | $\epsilon = 580 \pm 30$                          | --                                                  |
| <b>Fe<sup>III</sup>(Hbip)</b>            | 460               | $\epsilon = (4.0 \pm 1.1)T + (73 \pm 324)$                     | $\epsilon = (-16.9 \pm 10.7)T + (6821 \pm 3375)$ | --                                                  |
|                                          | 510               | $\epsilon = (3.1 \pm 1.0)T + (224 \pm 309)$                    | $\epsilon = (-14 \pm 7)T + (5734 \pm 2314)$      | --                                                  |
|                                          | 645               | $\epsilon = (-6.41 \pm 0.58)T + (4863 \pm 175)$                | $\epsilon = (-34 \pm 13)T + (13048 \pm 4199)$    | --                                                  |
| <b>Fe<sup>III</sup>(Hbim)</b>            | 460               | $\epsilon = 3170 \pm 100$                                      | --                                               | $\epsilon = 3600 \pm 150$                           |
|                                          | 472               | $\epsilon = 2650 \pm 80$                                       | --                                               | $\epsilon = 3100 \pm 100$                           |
|                                          | 676               | $\epsilon = 2900 \pm 120$                                      | --                                               | $\epsilon = 2700 \pm 140$                           |
| <b>Fe<sup>II</sup>(H<sub>2</sub>bim)</b> | 460               | $\epsilon = (-0.24 \pm 0.90)T + (1023 \pm 274)$                | --                                               | $\epsilon = (-4.15 \pm 1.38)T + (2302 \pm 424)$     |
|                                          | 472               | $\epsilon = (-1.41 \pm 0.53)T + (1360 \pm 163)$                | --                                               | $\epsilon = (-4.3 \pm 1.4)T + (2334 \pm 430)$       |
|                                          | 676               | $\epsilon = 40 \pm 5$                                          | --                                               | $\epsilon = 40 \pm 10$                              |
| TEMPO                                    | 460               | $\epsilon = (-0.0253 \pm 0.0009)T + (17.9 \pm 0.3)$            | $\epsilon = 11.8 \pm 0.1$                        | $\epsilon = (-0.022 \pm 0.002)T + (17.1 \pm 0.6)$   |
|                                          | 472               | $\epsilon = (-0.2371 \pm 0.0009)T + (17.2 \pm 0.3)$            | --                                               | $\epsilon = (-0.0206 \pm 0.0017)T + (16.8 \pm 0.5)$ |
|                                          | 510               | $\epsilon = (-0.0104 \pm 0.0008)T + (9.7 \pm 0.2)$             | $\epsilon = 7.2 \pm 0.1$                         | --                                                  |
|                                          | 645               | $\epsilon = (4.9 \pm 0.3) \times 10^{-5}T - (0.670 \pm 0.009)$ | $\epsilon = 0.04 \pm 0.05$                       | --                                                  |
|                                          | 676               | $\epsilon = 0.05 \pm 0.05$                                     | --                                               | $\epsilon = 0.05 \pm 0.05$                          |
| <b>[CpCp*Fe]<sup>+</sup></b>             | 740               | $\epsilon = (-0.94 \pm 0.04)T + (633 \pm 13)$                  | --                                               | --                                                  |

<sup>a</sup>  $\epsilon$  = extinction coefficient, M<sup>-1</sup>cm<sup>-1</sup>. T = Temperature, K. Equations apply over 270-330 K.

**Crystal Structures.** Crystals of  $\text{Fe}^{\text{III}}(\text{H}_2\text{bip})\cdot\text{MeCN}\cdot\text{Et}_2\text{O}$  were obtained by slow diffusion of  $\text{Et}_2\text{O}$  into MeCN at room temperature. They were mounted on a cyroloop with Paratone® oil, and data was collected in a nitrogen gas stream at 100 K. Intensity data was collected on an Bruker Platform Apex CCD diffractometer. The data was integrated using the Bruker SAINT software program and scaled using Bruker SADABS software. Solution by direct methods (SIR-2004) produced a complete heavy atom phasing model consistent with the proposed structure. All non-hydrogen atoms were refined anisotropically by full-matrix least-squares (SHELXL-97). All hydrogen atoms were placed using a riding model and their positions constrained relative to their parent atom using the appropriate HFIX command in SHELXL-97. One molecule of acetonitrile and diethyl ether co-crystallized with the target complex. However, degradation of the crystal was quick, even under oil, with the diethyl ether apparently desolvating from the crystal. From the data collection, it is estimated that 80% of the  $\text{Et}_2\text{O}$  remained in the crystal, with about 20% desolvated and leaving an empty void as refined from the data collected.

Crystals of  $\text{TEMPO-H}\cdot\frac{1}{3}\text{H}_2\text{O}$  formed upon leaving sublimed TEMPO-H under static vacuum for two weeks at room temperature. They were mounted on a glass capillary with oil. Data was collected at 130 K on an Enraf-Nonius KappaCCD diffractometer equipped with a fine focus Mo-target X-ray tube. The data were integrated and scaled using hkl-2000. This program applies a multiplicative correction factor (S) to the observed intensities (I):  $S = (e^{-2B(\sin^2\theta/\lambda^2)}) / \text{scale}$ . S is calculated from the scale and the B factor, which is determined for each frame and is then applied to I to give the corrected intensity ( $I_{\text{corr}}$ ). Solution by direct methods (SIR-97) produced a complete heavy atom phasing model consistent with the proposed structure. All hydroxyl and water hydrogen atoms were located from the difference map and refined isotropically. The remainder of the hydrogen atoms were placed using a riding model. All non-hydrogen atoms were refined anisotropically by full-matrix least-squares (SHELX-97).

**Table S5.** Refinement data for TEMPO-H and  $\text{Fe}^{\text{III}}(\text{H}_2\text{bip})_3(\text{ClO}_4)_3$  crystal structures.

|                                                  | <b>3 TEMPO-H•H<sub>2</sub>O</b>                                                                                                             | <b>Fe<sup>III</sup>(H<sub>2</sub>bip)<sub>3</sub>(ClO<sub>4</sub>)<sub>3</sub>•MeCN•Et<sub>2</sub>O</b>                    |
|--------------------------------------------------|---------------------------------------------------------------------------------------------------------------------------------------------|----------------------------------------------------------------------------------------------------------------------------|
| Empirical formula                                | C <sub>27</sub> H <sub>59</sub> N <sub>3</sub> O <sub>4</sub>                                                                               | C <sub>30</sub> H <sub>55</sub> Cl <sub>3</sub> FeN <sub>13</sub> O <sub>13</sub>                                          |
| Formula Weight                                   | 489.77                                                                                                                                      | 968.04                                                                                                                     |
| Temperature (K)                                  | 130(2)                                                                                                                                      | 100(2)                                                                                                                     |
| Wavelength (Å)                                   | 0.71073 Å                                                                                                                                   | 0.71073                                                                                                                    |
| Crystal description / color                      | prism / colorless                                                                                                                           | block / red                                                                                                                |
| Crystal system, space group                      | Triclinic, P-1 (No. 2)                                                                                                                      | Monoclinic, P2(1)/n                                                                                                        |
| Unit cell dimensions (Å, deg)                    | a = 8.1380(4)<br>b = 12.3840(8)<br>c = 16.0280(10)<br>$\alpha = 75.343(2)^\circ$<br>$\beta = 78.788(2)^\circ$<br>$\gamma = 78.105(3)^\circ$ | a = 9.906(3)<br>b = 21.996(7)<br>c = 19.615(6)<br>$\alpha = 90^\circ$<br>$\beta = 104.005(4)^\circ$<br>$\gamma = 90^\circ$ |
| Volume (Å <sup>3</sup> )                         | 1511.82(15)                                                                                                                                 | 4147(2)                                                                                                                    |
| Z, density (Mg/m <sup>3</sup> )                  | 2, 1.076                                                                                                                                    | 4, 1.366                                                                                                                   |
| $\mu$ (mm <sup>-1</sup> )                        | 0.071                                                                                                                                       | 0.622                                                                                                                      |
| F(000)                                           | 548                                                                                                                                         | 1772                                                                                                                       |
| Crystal size (mm)                                | 0.48 × 0.24 × 0.24                                                                                                                          | 0.15 × 0.15 × 0.15                                                                                                         |
| $\theta$ range for data collection (deg)         | 3.34° to 28.27°                                                                                                                             | 2.13° to 25.03°                                                                                                            |
| Index ranges                                     | -10 ≤ h ≤ 10<br>-13 ≤ k ≤ 16<br>-17 ≤ l ≤ 21                                                                                                | -11 ≤ h ≤ 11<br>-26 ≤ k ≤ 26<br>-23 ≤ l ≤ 23                                                                               |
| Reflections collected / unique                   | 8656 / 6206                                                                                                                                 | 29784 / 7322                                                                                                               |
| Completeness to $\theta$                         | 82.6%                                                                                                                                       | 99.9 %                                                                                                                     |
| Absorption correction                            | HKL-2000                                                                                                                                    | Semi-empirical from equivalents                                                                                            |
| Max. and min. transmission                       | 0.9832 and 0.9668                                                                                                                           | 0.9124 and 0.9124                                                                                                          |
| Refinement method                                | Full-matrix least-squares on F <sup>2</sup>                                                                                                 | Full-matrix least-squares on F <sup>2</sup>                                                                                |
| Data / restraints / parameters                   | 6206 / 0 / 336                                                                                                                              | 7322 / 0 / 545                                                                                                             |
| R(int)                                           | 0.0649                                                                                                                                      | 0.0566                                                                                                                     |
| Goodness-of-fit on F <sup>2</sup>                | 1.000                                                                                                                                       | 1.120                                                                                                                      |
| Final R, Rw (I > 2 $\sigma$ I) <sup>a</sup>      | 0.0633, 0.1407                                                                                                                              | 0.0687, 0.1656                                                                                                             |
| Largest diff. peak and hole (e Å <sup>-3</sup> ) | 0.228 and -0.228                                                                                                                            | 0.797 and -0.568                                                                                                           |

<sup>a</sup>w = 1/[s<sup>2</sup>(F<sub>o</sub><sup>2</sup>) + (0.0450P)<sup>2</sup> + 0.0000P] where P = (F<sub>o</sub><sup>2</sup> + 2F<sub>c</sub><sup>2</sup>)/3

**Calculation of  $\Delta S^\circ[\text{H}^\bullet]$  in various solvents:****Table S6:** Relevant parameters for calculation of  $\Delta S^\circ[\text{H}^\bullet]$  in various solvents.

| Solvent            | $S_f^\circ[\text{H}^\bullet]_g^a$ | $\Delta S_{\text{solvation}}^\circ[\text{H}^\bullet]^b$ | $T\Delta S^\circ[\text{H}^\bullet]^c$ |
|--------------------|-----------------------------------|---------------------------------------------------------|---------------------------------------|
| MeCN               | 27.419                            | -11.92 <sup>d</sup>                                     | 4.62                                  |
| DMSO               | 27.419                            | -12.0 <sup>e</sup>                                      | 4.60                                  |
| toluene            | 27.419                            | -11.40 <sup>d</sup>                                     | 4.78                                  |
| 1,2-dichloroethane | 27.419                            | -11.1 <sup>e</sup>                                      | 4.87                                  |
| DMF                | 27.419                            | -12.14 <sup>d</sup>                                     | 4.56                                  |
| H <sub>2</sub> O   | 27.419                            | -17.50 <sup>e,f</sup>                                   | 2.96                                  |

<sup>a</sup> Values in cal mol<sup>-1</sup> K<sup>-1</sup>. Standard State = 1 bar and 298 K. Reference 3. <sup>b</sup> Values in cal mol<sup>-1</sup> K<sup>-1</sup>. Standard State = 1 atm (gas phase), 1 M (solution) and 298 K. <sup>c</sup>  $\Delta S^\circ[\text{H}^\bullet] = S_f^\circ[\text{H}^\bullet]_g + \Delta S_{\text{solvation}}^\circ[\text{H}^\bullet]$ . Values in kcal mol<sup>-1</sup> at 298 K. <sup>d</sup> Reference 4. <sup>e</sup> Reference 5. <sup>f</sup> Converted to 1 M standard state from unit mole fraction standard state. See Appendix 1 for derivation of this conversion.

**Appendix 1:**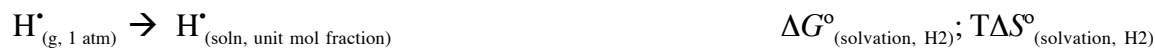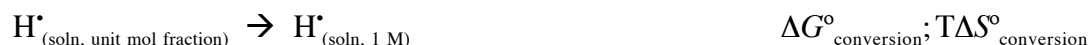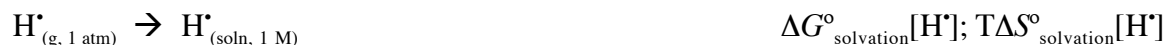

In the equations above,  $\text{H}^\bullet_{(\text{a}, \text{b})}$  refers to  $\text{H}^\bullet$  in phase *a* at standard state *b*. The mole fraction of gas,  $x_g$ , is related to the number of moles of gas  $n_g$  dissolved in the number of moles of liquid,  $n_{\text{liq}}$ , by eq A1.

$$x_g = \frac{n_g}{n_g + n_{\text{liq}}} \quad (\text{A1})$$

Rearranging:

$$n_g = \frac{x_g n_{\text{liq}}}{(1 - x_g)} \quad (\text{A2})$$

The concentration of dissolved gas,  $c_g$ , is defined as the number of moles per total volume, which is approximately the same as the volume of liquid for dilute solutions.

$$c_g = \frac{n_g}{V_{tot}} \approx \frac{n_g}{V_{liq}} \quad (A3)$$

Substituting  $n_g$  from eq A2 above, yields eq A4.  $V_m$  is the molar volume of the solvent liquid ( $= V_{liq} / n_{liq}$ ).

$$c_g = \frac{\frac{x_g n_{liq}}{(1-x_g)}}{V_{liq}} = \frac{n_{liq} x_g}{V_{liq}(1-x_g)} = \frac{x_g}{V_m(1-x_g)} \quad (A4)$$

For  $H_2$  in  $H_2O$  at 298 K.<sup>5</sup>

$$x_{g(1\ atm)} = 1.411 \times 10^{-5}$$

$$V_m(H_2O) = \frac{18.0153g}{mol} * \frac{mL}{0.9970480g} * \frac{L}{1000mL} = 0.018069\ L/mol$$

Therefore the concentration of dissolved gas at 1 atm is:

$$c_{g(1atm)} = \frac{x_g}{V_m(1+x_g)} = \frac{1.411 \times 10^{-5}}{0.018069(1+1.411 \times 10^{-5})} = 7.809 \times 10^{-4}\ M \quad (A6)$$

Using proportionality we can determine what the concentration of dissolved gas  $c_{g(x=1)}$  will be at  $x_g = 1$ .

$$\frac{c_{g(1atm)}}{c_{g(x=1)}} = \frac{x_{g(1atm)}}{x_{g(x=1)}} \quad (A7)$$

$$c_{g(x=1)} = 7.809 \times 10^{-4}\ M \times \frac{1}{1.411 \times 10^{-5}} = 55.35\ M \quad (A8)$$

By definition using chemical potentials:

$$T\Delta S^\circ_{conversion} = \mu^\circ_{products} - \mu^\circ_{reactants} \quad (A9)$$

$$T\Delta S^\circ_{conversion} = \mu^\circ_{(soln, 1\ M)} - [\mu^\circ_{(soln, 1\ M)} + RT\ln[c_{g(x=1)}]] \quad (A10)$$

$$T\Delta S^\circ_{conversion} = -RT\ln[c_{g(x=1)}] \quad (A11)$$

$$T\Delta S^\circ_{conversion} = -RT\ln[55.35M] = -9.944\ kJ/mol = -2.377\ kcal/mol \quad (A12)$$

Using  $\Delta S^\circ_{solvation}[H^\bullet]$  from reference 5 and eq A12 above:

$$T\Delta S^\circ_{solvation}[H^\bullet] = T\Delta S^\circ_{(solvation, H_2)} + T\Delta S^\circ_{conversion} \quad (A13)$$

$$\Delta S^\circ_{solvation}[H^\bullet] = \Delta S^\circ_{(solvation, H_2)} + (T\Delta S^\circ_{conversion})/T \quad (A14)$$

$$\Delta S^\circ_{solvation}[H^\bullet] = -25.478 - (2.377*1000)/298 = -17.50\ cal\ mol^{-1}\ K^{-1} \quad (A15)$$



- 
- (1) Matheson, I. B. C. *RSM-1000 Global Fit Software*, version 6.3.8; On-Line Instrument Systems (Olis), Inc. 1998.
- (2) SPECFIT/32, versions v3.0.26 and v3.0.36; Spectrum Software Associates, 2000.
- (3) NIST Standard Reference Database 69, June 2005 Release: NIST Chemistry WebBook. <http://webbook.nist.gov/chemistry/>
- (4) Brunner, E. *J. Chem. Eng. Data* **1985**, 30, 269-273.
- (5) a) IUPAC, *Solubility Data Series*; Young, C. L. Ed.; Hydrogen and Deuterium, Vol. 5/6; Pergamon Press: New York, NY, 1981; 1-3, 259, 239. b) *Handbook of Chemistry and Physics*, 87<sup>th</sup> ed.; Lide, D.R. Ed.; CRC Press: Boca Raton, FL, 2006-2007, 6-4.
